# Supplementary material for: Reeling in the prey: Fishing behaviour in an orb web spider
Source: Oxford University Press journal article supplement (doi:10.1242/jeb.213751), 2019-01-01
Supplement: jeb213751supp.pdf [file jeb213751supp.pdf]

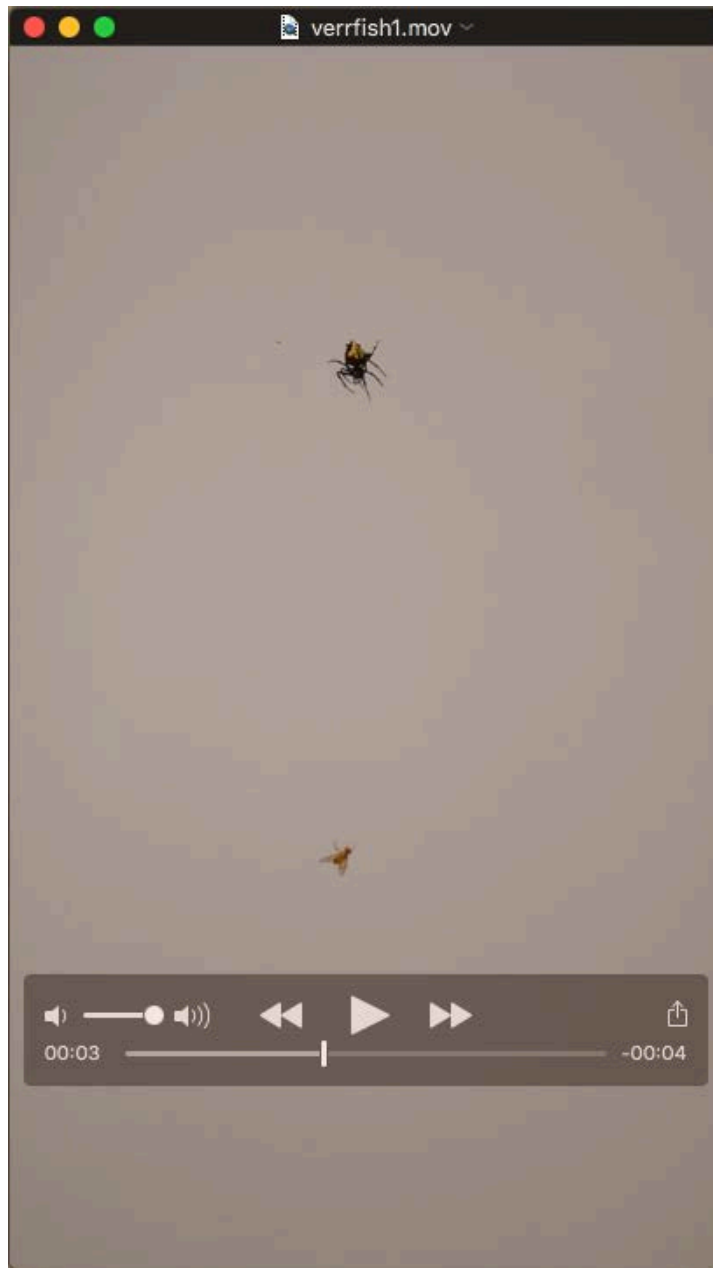

Movie 1. Movie showing the reeling behaviour in *Verrucosa arenata*.

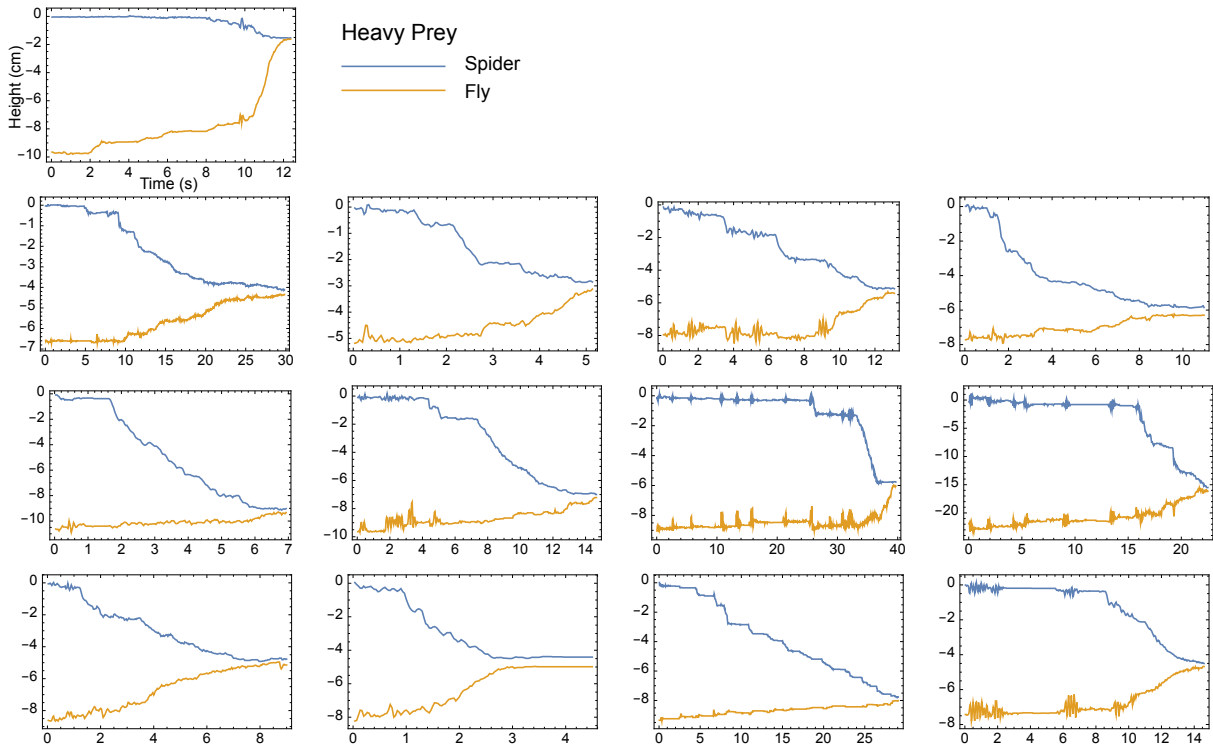

Figure S1: All trajectories of *V. arenata* spiders (blue line) as they approached Heavy prey (*A. ludens*; yellow line), shown here as a time series plot. The Y axis represents the vertical component of positions of the spider and fly (i.e., height in the web), and the X axis is the time taken (in seconds) for the spider to make contact with the fly.

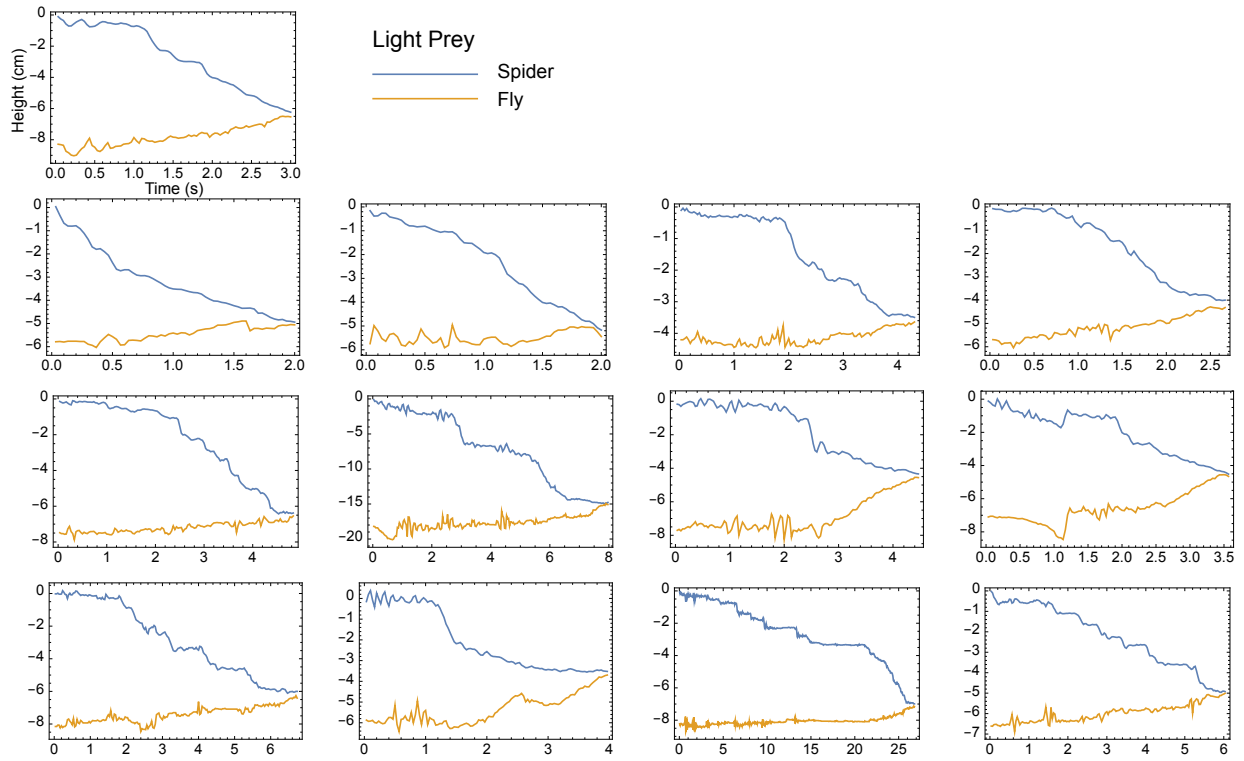

Figure S2: All trajectories of *V. arenata* spiders (blue line) as they approached Light prey (*A. ludens*; yellow line)), shown here as a time series plot. The Y axis represents the vertical component of positions of the spider and fly (i.e., height in the web), and the X axis is the time taken (in seconds) for the spider to make contact with the fly.
